# Supplementary material
Source: publisher site journal article supplement (https://www.spandidos-publications.com/3094/downloadSupplementary)
Supplement: Supplementary file 1 [file downloadSupplementary]

## Sheet: Sheet1
Supplementary Table Ⅵ. Commonly expressed mRNA with 1.5 fold change between mid-secretory phase and proliferative phase endometrium.
A, Upregulated common expressed mRNAs
Gene_Symbol	Description	FC	FC-SD	p-value
CXCL14	C-X-C motif chemokine ligand 14	162.855	1.60752	0.00244346
TCN1	transcobalamin 1	71.4916	0.952368	6.03 x 10-4
C2CD4A	C2 calcium dependent domain containing 4A	59.5485	2.01187	0.00686884
C4BPA	complement component 4 binding protein alpha	40.8157	0.841097	1.89 x 10-5
AOX1	aldehyde oxidase 1	38.7763	1.09304	0.00193765
DKK1	dickkopf WNT signaling pathway inhibitor 1	29.9378	1.44307	0.00210316
SLC15A1	solute carrier family 15 member 1	29.6491	1.67407	0.0082091
MAOA	monoamine oxidase A	24.6991	0.881264	6.54 x 10-5
SLC1A1	solute carrier family 1 member 1	23.0258	1.3218	0.00358331
SCARA5	scavenger receptor class A member 5	22.9564	0.961345	1.14 x 10-4
ANGPTL1	angiopoietin like 1	19.2124	1.4076	0.00222508
IRX3	iroquois homeobox 3	16.4827	1.09063	0.0038614
RIMKLB	ribosomal modification protein rimK like family member B	16.077	1.18242	0.00469774
IDO1	indoleamine 2,3-dioxygenase 1	15.7388	1.59522	0.00259439
NNMT	nicotinamide N-methyltransferase	14.9909	0.417186	2.16 x 10-6
CD55	CD55 molecule (Cromer blood group)	14.14	1.02694	0.00128772
CRISP3	cysteine rich secretory protein 3	14.0524	1.32725	0.00123752
C2CD4B	C2 calcium dependent domain containing 4B	13.5254	1.2557	0.00471696
PHYHIPL	phytanoyl-CoA 2-hydroxylase interacting protein like	11.019	1.27393	0.00953914
HAP1	huntingtin associated protein 1	10.4451	1.06571	0.00752841
APOD	apolipoprotein D	9.93681	1.02462	8.18 x 10-4
ARG2	arginase 2	9.77587	1.20349	0.00480602
TMEM45B	transmembrane protein 45B	9.6801	1.12561	0.00391591
SOD2	superoxide dismutase 2	9.47438	0.91276	4.13 x 10-4
AQP3	aquaporin 3 (Gill blood group)	8.91787	0.856465	0.00328185
GRAMD1C	GRAM domain containing 1C	8.84409	0.842416	0.00205051
HAL	histidine ammonia-lyase	8.39217	1.39411	0.0199318
TIMP3	TIMP metallopeptidase inhibitor 3	7.93528	1.29018	0.00375135
GALNT13	polypeptide N-acetylgalactosaminyltransferase 13	7.82806	0.619413	8.01 x 10-5
FAM84B	family with sequence similarity 84 member B	6.42405	1.44867	0.0276989
LMOD1	leiomodin 1	5.72287	0.54928	9.91 x 10-5
GBP2	guanylate binding protein 2	5.56993	0.724749	0.00328225
CEBPD	CCAAT/enhancer binding protein delta	5.56312	0.727544	5.47 x 10-4
IL15	interleukin 15	5.51096	0.84881	0.0045539
ANXA4	annexin A4	5.48816	0.708121	5.78 x 10-4
MYOCD	myocardin	5.25359	0.716352	0.0063291
NABP1	nucleic acid binding protein 1	5.18091	0.75045	7.77 x 10-4
PLA2G16	phospholipase A2 group XVI	5.12132	0.869101	0.00311455
ADCY1	adenylate cyclase 1	5.03408	0.763779	0.004741
CDYL2	chromodomain Y like 2	5.00628	1.2069	0.0225322
FBXO32	F-box protein 32	4.9706	0.864422	0.00237137
GABARAPL1	GABA type A receptor associated protein like 1	4.96019	0.377358	3.22 x 10-5
EFNA1	ephrin A1	4.8407	0.84375	0.00287065
STAR	steroidogenic acute regulatory protein	4.59781	0.610105	0.00337524
STC1	stanniocalcin 1	4.5823	0.981176	0.00741816
ADAMTS15	ADAM metallopeptidase with thrombospondin type 1 motif 15	4.53444	1.27659	0.0141998
NDRG1	N-myc downstream regulated 1	4.44516	0.721174	0.00415121
RHPN2	rhophilin Rho GTPase binding protein 2	4.42323	1.26564	0.0364884
CRYAB	crystallin alpha B	4.40991	0.420909	1.48 x 10-4
SORCS1	sortilin related VPS10 domain containing receptor 1	4.38477	0.652013	0.00619247
LMCD1	LIM and cysteine rich domains 1	4.27876	0.468853	1.62 x 10-4
C1R	complement C1r	4.21197	0.47013	2.26 x 10-4
IDO2	indoleamine 2,3-dioxygenase 2	4.1896	0.470312	1.45 x 10-4
BCL6	B-cell CLL/lymphoma 6	4.09146	0.59956	0.00202286
VNN1	vanin 1	4.03263	1.21692	0.0180181
NFIL3	nuclear factor, interleukin 3 regulated	3.75242	0.888732	0.00880963
DNAJC6	DnaJ heat shock protein family (Hsp40) member C6	3.30313	0.894693	0.0276159
TMEM37	transmembrane protein 37	3.29264	0.551403	0.0039478
HAND2	heart and neural crest derivatives expressed 2	3.1254	0.423438	3.33 x 10-4
PID1	phosphotyrosine interaction domain containing 1	2.18917	0.741356	0.0225574
B, Downregulated common expressed mRNAs
Gene_Symbol	Description	FC	FC-SD	p-value
AFF2	AF4/FMR2 family member 2	-1.60204	0.360805	0.0314091
VWDE	von Willebrand factor D and EGF domains	-1.8729	0.289196	0.00256027
ROBO2	roundabout guidance receptor 2	-2.19167	0.558378	0.0261301
PCDH10	protocadherin 10	-2.48592	0.466452	0.00430623
IQGAP3	IQ motif containing GTPase activating protein 3	-2.81675	0.707985	0.00587486
SKA3	spindle and kinetochore associated complex subunit 3	-2.91423	0.52509	0.00210561
PLEKHG4B	pleckstrin homology and RhoGEF domain containing G4B	-3.15376	0.354316	7.88 x 10-4
ESR1	estrogen receptor 1	-3.25831	0.579659	0.00473772
MND1	meiotic nuclear divisions 1	-3.28565	0.647852	0.00254732
SLC27A6	solute carrier family 27 member 6	-3.40799	0.941659	0.0205446
HMGA2	high mobility group AT-hook 2	-3.4663	0.428135	0.00176009
GPR137C	G protein-coupled receptor 137C	-3.64338	0.352169	6.75 x 10-5
ERMN	ermin	-3.67473	0.885513	0.0210573
HMMR	hyaluronan mediated motility receptor	-3.7334	0.921021	0.0145843
FAM83D	family with sequence similarity 83 member D	-3.95162	0.589908	6.62 x 10-4
NEK2	NIMA related kinase 2	-4.02535	0.621917	0.00231821
TTK	TTK protein kinase	-4.2449	0.827757	0.00650887
GALNT12	polypeptide N-acetylgalactosaminyltransferase 12	-4.35884	0.542205	3.07 x 10-4
CENPF	centromere protein F	-4.36143	0.816957	0.00300256
RTKN2	rhotekin 2	-4.4084	0.211567	1.87 x 10-4
NRCAM	neuronal cell adhesion molecule	-4.69377	0.472975	0.00181912
LAMA1	laminin subunit alpha 1	-4.74961	0.69396	0.00275938
CCNB2	cyclin B2	-4.76627	0.778158	0.00285041
DEPDC1	DEP domain containing 1	-4.88642	0.753581	0.00139503
BUB1B	BUB1 mitotic checkpoint serine/threonine kinase B	-4.90324	0.727395	0.00292241
KIF23	kinesin family member 23	-4.91185	0.762044	0.00145427
CRISPLD1	cysteine rich secretory protein LCCL domain containing 1	-5.19555	0.5472	1.85 x 10-4
DLGAP5	DLG associated protein 5	-5.28479	0.871716	0.0023318
TOP2A	topoisomerase (DNA) II alpha	-5.6967	0.86915	0.00195305
MSX2	msh homeobox 2	-5.75956	0.988458	0.00219985
ADCYAP1R1	ADCYAP receptor type I	-5.77046	1.28411	0.00844201
NPAS3	neuronal PAS domain protein 3	-5.77094	0.930515	0.00796658
CBLN1	cerebellin 1 precursor	-6.25	0.741822	0.00470746
PBK	PDZ binding kinase	-6.31324	0.96022	0.00615837
OLFM1	olfactomedin 1	-9.65397	0.646342	7.57 x 10-5
EDN3	endothelin 3	-9.68112	0.654804	5.92 x 10-5
RBP7	retinol binding protein 7	-10.1247	1.03736	0.00101895
SFRP4	secreted frizzled related protein 4	-33.4871	1.8222	0.00326741
